# Supplementary material for: Growth of Ready Meals in Australian Supermarkets: Nutrient Composition, Price and Serving Size
Source: MDPI journal article supplement (doi:10.3390/foods10071667), 2021-07-20
Supplement: s1 [file s1]

## Supplementary Materials

**Table S1.** Number of ready meals, pizzas and salads collected each year and percentage change from 2014 to 2020.

| Type of product | Year |      |       |       |      |      |       | Total | Percentage increase 2014 to 2020 | Average percentage change for each year |
|-----------------|------|------|-------|-------|------|------|-------|-------|----------------------------------|-----------------------------------------|
|                 | 2014 | 2015 | 2016† | 2017† | 2018 | 2019 | 2020‡ |       |                                  |                                         |
| Ready meals     | 243  | 241  | 384   | 406   | 389  | 450  | 468   | 2581  | 93%                              | 13%                                     |
| Pizzas          | 60   | 54   | 92    | 107   | 79   | 99   | 98    | 589   | 63%                              | 12%                                     |
| Salads          | 39   | 48   | 95    | 82    | 112  | 101  | 133   | 610   | 241%                             | 28%                                     |
| Total           | 342  | 344  | 571   | 596   | 580  | 650  | 699   | 3782  | 104%                             | 15%                                     |

Data for 2014 to 2019 from FoodTrack™ database; †ALDI products introduced in 2016 and IGA products introduced in 2017; ‡Data for 2020 from Woolworths, Coles and ALDI in Adelaide.

**Table S2:** Serving size, price and nutrient content of ready meals, pizzas and salads from 2014 to 2020 (25th and 75th percentile).

|                             | Type of product | 2014 |      | 2015 |      | 2016† |      | Year<br>2017† |      | 2018 |      | 2019 |      | 2020‡ |      | Total |      |
|-----------------------------|-----------------|------|------|------|------|-------|------|---------------|------|------|------|------|------|-------|------|-------|------|
|                             |                 | 25th | 75th | 25th | 75th | 25th  | 75th | 25th          | 75th | 25th | 75th | 25th | 75th | 25th  | 75th | 25th  | 75th |
| Serving size (g)            | Ready meals     | 300  | 360  | 280  | 370  | 285   | 360  | 300           | 370  | 300  | 360  | 305  | 375  | 300   | 375  | 300   | 370  |
|                             | Pizzas          | 78   | 135  | 80   | 125  | 63    | 125  | 67            | 125  | 75   | 135  | 85   | 150  | 80    | 125  | 78    | 125  |
|                             | Salads          | 125  | 150  | 125  | 188  | 116   | 190  | 110           | 185  | 123  | 185  | 100  | 180  | 117   | 185  | 116   | 185  |
| <b>Price</b>                |                 |      |      |      |      |       |      |               |      |      |      |      |      |       |      |       |      |
| Total price of product (\$) | Ready meals     | 4.20 | 6.99 | 4.50 | 7.00 | 4.00  | 7.00 | 4.00          | 7.00 | 4.00 | 8.00 | 4.99 | 8.50 | 4.00  | 8.52 | 4.20  | 7.99 |
|                             | Pizzas          | 5.25 | 7.50 | 4.99 | 7.50 | 4.00  | 7.25 | 4.00          | 7.50 | 3.99 | 7.00 | 3.99 | 7.50 | 4.50  | 7.50 | 4.00  | 7.50 |
|                             | Salads          | 5.00 | 6.98 | 5.00 | 6.00 | 3.49  | 5.00 | 3.50          | 5.00 | 4.00 | 6.00 | 4.50 | 6.00 | 4.00  | 5.99 | 4.00  | 5.99 |
| Price per 100 g (\$)        | Ready meals     | 1.20 | 1.91 | 1.19 | 2.00 | 1.14  | 2.00 | 1.15          | 2.03 | 1.05 | 2.19 | 1.25 | 2.14 | 1.17  | 2.14 | 1.15  | 2.06 |
|                             | Pizzas          | 1.29 | 2.15 | 1.17 | 2.11 | 1.01  | 1.81 | 0.98          | 1.75 | 0.96 | 1.80 | 1.06 | 2.00 | 1.06  | 1.91 | 1.06  | 1.92 |
|                             | Salads          | 1.42 | 2.62 | 1.49 | 2.33 | 1.42  | 2.26 | 1.25          | 2.25 | 1.25 | 2.35 | 1.20 | 2.27 | 1.25  | 2.29 | 1.25  | 2.28 |
| Price per serve (\$)        | Ready meals     | 3.99 | 6.49 | 3.55 | 6.69 | 3.50  | 6.99 | 3.99          | 6.99 | 3.50 | 7.50 | 4.00 | 8.00 | 3.50  | 8.01 | 3.50  | 7.00 |
|                             | Pizzas          | 1.15 | 2.50 | 0.88 | 1.99 | 0.75  | 1.75 | 0.75          | 2.00 | 0.74 | 2.25 | 0.76 | 3.25 | 0.83  | 2.50 | 0.75  | 2.00 |
|                             | Salads          | 1.66 | 5.00 | 1.66 | 5.00 | 1.89  | 3.99 | 1.50          | 3.68 | 1.49 | 4.00 | 1.25 | 3.99 | 1.49  | 4.00 | 1.50  | 4.00 |
| <b>Nutrient per 100 g</b>   |                 |      |      |      |      |       |      |               |      |      |      |      |      |       |      |       |      |
| Energy (kJ)                 | Ready meals     | 400  | 569  | 408  | 592  | 412   | 609  | 409           | 599  | 400  | 598  | 411  | 588  | 411   | 608  | 408   | 597  |
|                             | Pizzas          | 928  | 1035 | 934  | 1080 | 910   | 1050 | 920           | 1080 | 941  | 1070 | 921  | 1050 | 936   | 1030 | 928   | 1050 |
|                             | Salads          | 362  | 595  | 429  | 650  | 474   | 672  | 462           | 680  | 491  | 746  | 451  | 731  | 461   | 663  | 457   | 684  |
| Protein (g)                 | Ready meals     | 4.4  | 6.4  | 4.4  | 6.6  | 4.6   | 6.7  | 4.7           | 7.1  | 4.6  | 7.1  | 4.5  | 8.0  | 4.6   | 7.8  | 4.6   | 7.1  |
|                             | Pizzas          | 9.2  | 11.4 | 9.2  | 11.5 | 9.3   | 11.8 | 9.2           | 11.7 | 9.4  | 11.3 | 9.1  | 11.2 | 8.5   | 10.6 | 9.1   | 11.2 |
|                             | Salads          | 1.8  | 4.3  | 2.7  | 4.7  | 2.9   | 7.7  | 2.2           | 6.9  | 2.0  | 6.5  | 1.8  | 5.1  | 2.3   | 6.1  | 2.1   | 6.2  |
| Total fat (g)               | Ready meals     | 2.3  | 5.5  | 2.4  | 6.1  | 2.4   | 6.1  | 2.3           | 5.6  | 2.5  | 5.9  | 2.5  | 6.0  | 2.6   | 6.1  | 2.4   | 5.9  |
|                             | Pizzas          | 6.7  | 10.0 | 7.0  | 10.6 | 6.9   | 10.2 | 6.6           | 10.0 | 6.4  | 10.0 | 6.8  | 9.6  | 6.7   | 9.1  | 6.8   | 10.0 |
|                             | Salads          | 5.1  | 9.7  | 5.5  | 9.7  | 4.6   | 8.9  | 5.0           | 9.4  | 5.9  | 10.6 | 6.1  | 10.5 | 5.1   | 9.5  | 5.3   | 9.7  |

| Nutrient composition of ready meals, pizzas and salads |             |      |      |      |      |      |      |      |      |      |      |      |      |      |      |      |      |
|--------------------------------------------------------|-------------|------|------|------|------|------|------|------|------|------|------|------|------|------|------|------|------|
| Saturated fat (g)                                      | Ready meals | 0.9  | 2.6  | 0.9  | 3.0  | 0.9  | 2.8  | 0.7  | 2.5  | 0.9  | 2.8  | 0.8  | 2.8  | 0.9  | 2.7  | 0.8  | 2.8  |
|                                                        | Pizzas      | 2.9  | 4.6  | 2.8  | 4.6  | 2.8  | 4.2  | 2.8  | 4.2  | 2.8  | 4.4  | 2.8  | 4.5  | 2.6  | 4.5  | 2.8  | 4.4  |
|                                                        | Salads      | 0.6  | 2.1  | 0.5  | 1.7  | 0.6  | 1.7  | 0.2  | 1.7  | 0.1  | 1.7  | 0.0  | 1.9  | 0.0  | 1.7  | 0.3  | 1.7  |
| Carbohydrate (g)                                       | Ready meals | 11.8 | 17.0 | 10.0 | 17.0 | 10.5 | 16.8 | 10.8 | 17.0 | 10.0 | 16.1 | 9.9  | 15.9 | 10.3 | 16.1 | 10.4 | 16.4 |
|                                                        | Pizzas      | 25.7 | 30.6 | 25.4 | 30.2 | 24.9 | 30.1 | 25.0 | 30.4 | 26.4 | 31.5 | 26.0 | 30.9 | 26.7 | 31.3 | 25.6 | 30.5 |
|                                                        | Salads      | 6.0  | 13.9 | 7.2  | 14.1 | 8.5  | 14.8 | 7.0  | 15.7 | 7.8  | 16.5 | 6.0  | 15.3 | 6.4  | 16.1 | 6.9  | 15.7 |
| Sugars (g)                                             | Ready meals | 1.4  | 2.9  | 1.7  | 3.2  | 1.6  | 3.0  | 1.5  | 3.1  | 1.5  | 2.9  | 1.5  | 2.9  | 1.4  | 2.9  | 1.5  | 3.0  |
|                                                        | Pizzas      | 3.4  | 6.1  | 3.3  | 5.7  | 3.3  | 5.7  | 3.3  | 5.6  | 2.6  | 5.5  | 3.2  | 5.5  | 3.5  | 5.9  | 3.3  | 5.7  |
|                                                        | Salads      | 2.3  | 5.1  | 2.5  | 5.4  | 1.7  | 5.1  | 1.8  | 4.8  | 2.2  | 5.3  | 2.8  | 5.0  | 2.3  | 5.0  | 2.2  | 5.0  |
| Fibre (g)                                              | Ready meals | 1.0  | 1.8  | 1.0  | 1.9  | 1.1  | 2.2  | 1.1  | 2.1  | 1.2  | 2.0  | 1.1  | 2.1  | 1.0  | 2.1  | 1.1  | 2.0  |
|                                                        | Pizzas      | 1.7  | 2.2  | 2.1  | 3.4  | 1.8  | 3.0  | 2.0  | 3.0  | 2.0  | 3.3  | 1.9  | 2.8  | 1.9  | 2.9  | 1.9  | 3.0  |
|                                                        | Salads      | 1.8  | 2.6  | 1.9  | 2.9  | 1.9  | 3.3  | 1.7  | 2.9  | 1.7  | 3.3  | 1.7  | 2.8  | 1.7  | 3.0  | 1.7  | 2.9  |
| Sodium (mg)                                            | Ready meals | 225  | 339  | 240  | 352  | 220  | 317  | 213  | 305  | 210  | 313  | 190  | 300  | 195  | 300  | 210  | 316  |
|                                                        | Pizzas      | 400  | 601  | 440  | 610  | 420  | 630  | 388  | 600  | 370  | 600  | 384  | 580  | 350  | 550  | 390  | 595  |
|                                                        | Salads      | 190  | 333  | 208  | 330  | 222  | 331  | 220  | 336  | 221  | 368  | 220  | 336  | 215  | 362  | 220  | 352  |
| Nutrient per serve                                     |             |      |      |      |      |      |      |      |      |      |      |      |      |      |      |      |      |
| Energy (kJ)                                            | Ready meals | 1229 | 1992 | 1220 | 1996 | 1222 | 2093 | 1267 | 2055 | 1264 | 2044 | 1340 | 2052 | 1280 | 2104 | 1269 | 2055 |
|                                                        | Pizzas      | 743  | 1297 | 872  | 1234 | 640  | 1199 | 792  | 1236 | 690  | 1363 | 872  | 1450 | 802  | 1205 | 782  | 1250 |
|                                                        | Salads      | 481  | 1015 | 613  | 1009 | 582  | 1171 | 557  | 1171 | 712  | 1188 | 482  | 1103 | 576  | 1085 | 571  | 1110 |
| Protein (g)                                            | Ready meals | 13.4 | 21.6 | 13.5 | 22.4 | 14.2 | 22.8 | 14.9 | 24.2 | 14.3 | 25.2 | 14.7 | 27.9 | 14.6 | 26.5 | 14.4 | 24.5 |
|                                                        | Pizzas      | 8.5  | 15.5 | 8.2  | 15.8 | 7.2  | 14.2 | 7.2  | 14.5 | 7.5  | 16.3 | 7.7  | 16.5 | 7.4  | 13.6 | 7.5  | 14.8 |
|                                                        | Salads      | 1.7  | 7.3  | 3.2  | 8.5  | 3.3  | 12.8 | 2.7  | 11.6 | 2.7  | 10.7 | 2.1  | 8.1  | 2.8  | 12.4 | 2.7  | 10.5 |
| Total fat (g)                                          | Ready meals | 7.4  | 17.6 | 7.4  | 18.8 | 7.5  | 19.4 | 7.2  | 17.9 | 8.0  | 18.6 | 8.0  | 20.7 | 8.1  | 19.6 | 7.7  | 19.0 |
|                                                        | Pizzas      | 6.1  | 11.3 | 6.5  | 11.0 | 5.3  | 10.9 | 5.5  | 11.0 | 5.7  | 11.3 | 5.9  | 13.0 | 5.7  | 10.9 | 5.9  | 11.2 |
|                                                        | Salads      | 6.8  | 15.6 | 7.6  | 15.1 | 6.4  | 14.2 | 6.4  | 14.0 | 7.6  | 15.4 | 7.8  | 16.0 | 7.0  | 13.6 | 6.9  | 14.8 |
| Saturated fat (g)                                      | Ready meals | 2.8  | 8.3  | 2.7  | 8.8  | 2.7  | 9.0  | 2.4  | 8.1  | 2.7  | 8.8  | 2.7  | 9.3  | 2.6  | 8.4  | 2.6  | 8.6  |

|                  |             |      |      |      |      |      |      |      |      |      |      |      |      |      |      |      |      |
|------------------|-------------|------|------|------|------|------|------|------|------|------|------|------|------|------|------|------|------|
|                  | Pizzas      | 2.8  | 5.0  | 3.2  | 5.0  | 2.3  | 4.8  | 2.6  | 4.9  | 2.6  | 5.5  | 2.6  | 5.8  | 2.5  | 5.4  | 2.6  | 5.1  |
|                  | Salads      | 0.7  | 3.2  | 0.5  | 2.3  | 0.7  | 2.3  | 0.3  | 2.1  | 0.1  | 2.1  | 0.0  | 2.5  | 0.0  | 2.1  | 0.5  | 2.3  |
| Carbohydrate (g) | Ready meals | 34.9 | 58.8 | 31.3 | 56.6 | 31.3 | 57.8 | 33.6 | 57.1 | 30.0 | 56.2 | 31.6 | 56.2 | 32.0 | 56.4 | 32.0 | 56.6 |
|                  | Pizzas      | 19.0 | 41.0 | 20.0 | 36.9 | 19.2 | 34.7 | 20.8 | 37.8 | 19.5 | 43.9 | 26.7 | 43.3 | 22.4 | 38.4 | 20.9 | 38.5 |
|                  | Salads      | 7.5  | 24.3 | 9.1  | 27.4 | 11.5 | 26.2 | 10.0 | 26.3 | 10.4 | 25.7 | 8.4  | 23.3 | 9.6  | 24.8 | 10.0 | 25.3 |
|                  |             |      |      |      |      |      |      |      |      |      |      |      |      |      |      |      |      |
| Sugars (g)       | Ready meals | 4.5  | 10.0 | 4.9  | 10.2 | 4.8  | 9.8  | 4.8  | 10.1 | 4.8  | 9.8  | 4.8  | 10.4 | 4.6  | 10.0 | 4.8  | 10.0 |
|                  | Pizzas      | 3.1  | 8.4  | 3.3  | 7.7  | 2.6  | 6.3  | 3.0  | 6.4  | 2.5  | 6.8  | 3.4  | 6.9  | 3.8  | 7.5  | 3.1  | 6.9  |
|                  | Salads      | 3.3  | 7.0  | 3.4  | 8.3  | 2.5  | 6.4  | 2.3  | 6.3  | 2.8  | 7.3  | 3.7  | 7.2  | 3.3  | 6.7  | 3.0  | 7.0  |
|                  |             |      |      |      |      |      |      |      |      |      |      |      |      |      |      |      |      |
| Fibre (g)        | Ready meals | 3.2  | 6.1  | 3.0  | 6.1  | 3.5  | 6.6  | 3.4  | 7.0  | 3.5  | 6.5  | 3.5  | 6.8  | 3.2  | 6.7  | 3.4  | 6.7  |
|                  | Pizzas      | 0.9  | 2.3  | 1.6  | 3.9  | 1.9  | 3.4  | 1.9  | 3.5  | 1.8  | 3.5  | 1.4  | 2.6  | 2.1  | 3.5  | 1.8  | 3.4  |
|                  | Salads      | 2.4  | 3.5  | 2.7  | 4.5  | 2.8  | 5.6  | 2.1  | 4.5  | 2.2  | 5.5  | 2.1  | 3.6  | 2.2  | 4.3  | 2.3  | 4.4  |
|                  |             |      |      |      |      |      |      |      |      |      |      |      |      |      |      |      |      |
| Sodium (mg)      | Ready meals | 718  | 1085 | 721  | 1087 | 669  | 1030 | 669  | 1008 | 665  | 1015 | 630  | 1001 | 633  | 965  | 665  | 1031 |
|                  | Pizzas      | 338  | 689  | 349  | 844  | 350  | 731  | 349  | 763  | 348  | 850  | 371  | 739  | 281  | 752  | 342  | 752  |
|                  | Salads      | 266  | 487  | 307  | 494  | 287  | 629  | 270  | 513  | 286  | 572  | 263  | 513  | 276  | 581  | 278  | 546  |
|                  |             |      |      |      |      |      |      |      |      |      |      |      |      |      |      |      |      |

Data for 2014 to 2019 from FoodTrack™ database; †ALDI products introduced in 2016 and IGA products introduced in 2017; ‡Data for 2020 from Woolworths, Coles and ALDI in Adelaide.

**Table S3:** Nutrient content of ready meals, pizzas and salads from 2014 to 2020 (median).

|                    |             | Type of product    | Year data was collected |                   |                   |                   |                   |                          |       | Total | <i>p</i> -value§ | <i>p</i> -value for trend* |
|--------------------|-------------|--------------------|-------------------------|-------------------|-------------------|-------------------|-------------------|--------------------------|-------|-------|------------------|----------------------------|
|                    |             |                    | 2014                    | 2015              | 2016†             | 2017†             | 2018              | 2019                     | 2020‡ |       |                  |                            |
|                    |             |                    |                         |                   |                   |                   |                   |                          |       |       |                  |                            |
| Nutrient per 100 g |             |                    |                         |                   |                   |                   |                   |                          |       |       |                  |                            |
| Energy (kJ)        | Ready meals | 468                | 488                     | 494               | 492               | 495               | 496               | 503                      | 495   | 0.324 | 0.068            |                            |
|                    | Pizzas      | 968                | 973                     | 973               | 970               | 990               | 976               | 969                      | 974   | 0.841 | 0.804            |                            |
|                    | Salads      | 443 <sup>a</sup>   | 560                     | 554               | 565               | 629 <sup>a</sup>  | 554               | 567                      | 567   | 0.006 | 0.117            |                            |
| Protein (g)        | Ready meals | 5.3 <sup>a,b</sup> | 5.5                     | 5.6               | 5.7               | 5.7               | 5.8 <sup>a</sup>  | 5.7 <sup>b</sup>         | 5.6   | 0.004 | < 0.001          |                            |
|                    | Pizzas      | 10.45 <sup>a</sup> | 10.5 <sup>b</sup>       | 10.4 <sup>c</sup> | 10.2 <sup>d</sup> | 10.3 <sup>e</sup> | 10.0              | 9.6 <sup>a,b,c,d,e</sup> | 10.2  | 0.005 | < 0.001          |                            |
|                    | Salads      | 3.3 <sup>a,b</sup> | 3.7                     | 4.4 <sup>a</sup>  | 4.5 <sup>b</sup>  | 4.3               | 3.8               | 4.0                      | 4.0   | 0.002 | 0.911            |                            |
| Total fat (g)      | Ready meals | 3.4                | 3.6                     | 3.9               | 3.6               | 4.0               | 4.0               | 4.0                      | 3.8   | 0.027 | 0.004            |                            |
|                    | Pizzas      | 8.2                | 8.5                     | 8.0               | 8.0               | 8.1               | 8.2               | 7.8                      | 8.0   | 0.767 | 0.153            |                            |
|                    | Salads      | 7.0                | 7.6                     | 6.8               | 8.1               | 8.2               | 8.3               | 7.5                      | 7.8   | 0.066 | 0.165            |                            |
| Saturated fat (g)  | Ready meals | 1.4                | 1.4                     | 1.5               | 1.3               | 1.5               | 1.4               | 1.4                      | 1.4   | 0.409 | 0.648            |                            |
|                    | Pizzas      | 3.5                | 3.6                     | 3.6               | 3.5               | 3.9               | 3.7               | 3.5                      | 3.6   | 0.791 | 0.776            |                            |
|                    | Salads      | 1.0                | 1.0                     | 0.9               | 0.9               | 1.0               | 1.1               | 0.8                      | 1.0   | 0.735 | 0.180            |                            |
| Carbohydrate (g)   | Ready meals | 14 <sup>a</sup>    | 13.9                    | 13.7              | 13.5              | 13.2              | 13.2 <sup>a</sup> | 13.4                     | 13.5  | 0.009 | 0.002            |                            |
|                    | Pizzas      | 28.8               | 28.1                    | 27.5 <sup>a</sup> | 27.8              | 29.0              | 29.0              | 29.7 <sup>a</sup>        | 28.5  | 0.005 | 0.001            |                            |
|                    | Salads      | 10.0               | 11.1                    | 11.8              | 11.7              | 12.2              | 10.0              | 10.6                     | 11.5  | 0.608 | 0.878            |                            |
| Sugars (g)         | Ready meals | 2.1                | 2.4                     | 2.2               | 2.3               | 2.2               | 2.2               | 2.1                      | 2.2   | 0.063 | 0.028            |                            |
|                    | Pizzas      | 5.0                | 4.6                     | 4.0               | 4.0               | 3.7               | 4.1               | 4.8                      | 4.3   | 0.114 | 0.874            |                            |
|                    | Salads      | 3.5                | 3.3                     | 2.8 <sup>a</sup>  | 3.1               | 4.0               | 4 <sup>a</sup>    | 4.0                      | 3.6   | 0.074 | 0.088            |                            |
| Fibre (g)          | Ready meals | 1.5                | 1.5                     | 1.5               | 1.5               | 1.5               | 1.6               | 1.5                      | 1.5   | 0.444 | 0.927            |                            |
|                    | Pizzas      | 2.0                | 3.0                     | 2.2               | 2.4               | 2.5               | 2.3               | 2.5                      | 2.4   | 0.227 | 0.686            |                            |
|                    | Salads      | 2.2                | 2.5                     | 2.4               | 2.1               | 2.2               | 2.2               | 2.3                      | 2.2   | 0.419 | 0.372            |                            |

|                           |             |                      |                          |                      |                    |                  |                       |                      |      |         |         |
|---------------------------|-------------|----------------------|--------------------------|----------------------|--------------------|------------------|-----------------------|----------------------|------|---------|---------|
| Sodium (mg)               | Ready meals | 275 <sup>a,b,c</sup> | 295 <sup>d,e,f,g,h</sup> | 263 <sup>d,i,j</sup> | 256 <sup>a,e</sup> | 255 <sup>f</sup> | 239 <sup>b,g,i</sup>  | 240 <sup>c,h,j</sup> | 259  | <0.001  | < 0.001 |
|                           | Pizzas      | 480                  | 510 <sup>a</sup>         | 520 <sup>b</sup>     | 500                | 460              | 450                   | 424 <sup>a,b</sup>   | 480  | 0.002   | < 0.001 |
|                           | Salads      | 247                  | 264                      | 261                  | 245                | 278              | 280                   | 295                  | 270  | 0.798   | 0.174   |
| <b>Nutrient per serve</b> |             |                      |                          |                      |                    |                  |                       |                      |      |         |         |
| Energy (kJ)               | Ready meals | 1558                 | 1558                     | 1610                 | 1629               | 1621             | 1670                  | 1649                 | 1620 | 0.074   |         |
|                           | Pizzas      | 1056                 | 1103                     | 1065                 | 1070               | 1132             | 1150                  | 1041                 | 1089 | 0.617   |         |
|                           | Salads      | 641                  | 815                      | 882                  | 774                | 917              | 816                   | 857                  | 842  | 0.182   |         |
| Protein (g)               | Ready meals | 17.9 <sup>a,b</sup>  | 18 <sup>c</sup>          | 18.2 <sup>d</sup>    | 18.6               | 18.9             | 20.1 <sup>a,c,d</sup> | 19.2 <sup>b</sup>    | 18.8 | < 0.001 |         |
|                           | Pizzas      | 11.4                 | 11.4                     | 11.1                 | 11.4               | 12.0             | 12.1                  | 10.0                 | 11.3 | 0.654   |         |
|                           | Salads      | 4.3 <sup>a</sup>     | 5.3                      | 7.3 <sup>a,b</sup>   | 7.2                | 5.9              | 4.9 <sup>b</sup>      | 5.5                  | 5.5  | 0.008   |         |
| Total fat (g)             | Ready meals | 10.5                 | 10.7                     | 11.5                 | 10.5 <sup>a</sup>  | 11.7             | 12.6 <sup>a</sup>     | 12.7                 | 11.8 | 0.004   |         |
|                           | Pizzas      | 8.4                  | 9.6                      | 8.6                  | 8.5                | 7.5              | 8.6                   | 7.6                  | 8.3  | 0.899   |         |
|                           | Salads      | 10.2                 | 11.3                     | 10.8                 | 10.4               | 11.9             | 11.3                  | 10.0                 | 10.7 | 0.540   |         |
| Saturated fat (g)         | Ready meals | 4.6                  | 4.6                      | 4.9                  | 4.2                | 4.8              | 4.9                   | 4.8                  | 4.8  | 0.493   |         |
|                           | Pizzas      | 4.1                  | 4.1                      | 4.0                  | 3.6                | 3.8              | 4.0                   | 3.3                  | 3.8  | 0.735   |         |
|                           | Salads      | 1.3                  | 1.4                      | 1.5                  | 1.4                | 1.5              | 1.7                   | 1.4                  | 1.5  | 0.646   |         |
| Carbohydrate (g)          | Ready meals | 46.7                 | 45.2                     | 43.4                 | 44.6               | 44.5             | 43.4                  | 44.4                 | 44.4 | 0.412   |         |
|                           | Pizzas      | 31.0                 | 30.3                     | 29.9                 | 29.5               | 35.4             | 33.6                  | 33.2                 | 31.5 | 0.062   |         |
|                           | Salads      | 12.5                 | 15.3                     | 15.7                 | 14.9               | 16.2             | 13.3                  | 14.7                 | 15.0 | 0.381   |         |
| Sugars (g)                | Ready meals | 6.7                  | 7.5                      | 6.8                  | 7.0                | 6.7              | 7.0                   | 6.9                  | 6.9  | 0.634   |         |
|                           | Pizzas      | 4.9                  | 5.3                      | 4.3                  | 4.3                | 3.8              | 4.8                   | 5.2                  | 4.7  | 0.131   |         |
|                           | Salads      | 4.8                  | 5.0                      | 3.7                  | 3.8                | 5.1              | 5.4                   | 5.1                  | 4.8  | 0.059   |         |
| Fibre (g)                 | Ready meals | 5.1                  | 4.5                      | 4.8                  | 4.8                | 4.8              | 5.2                   | 4.9                  | 4.8  | 0.378   |         |
|                           | Pizzas      | 1.6                  | 3.3                      | 2.5                  | 2.8                | 2.6              | 2.0                   | 2.4                  | 2.3  | 0.073   |         |
|                           | Salads      | 2.9                  | 3.2                      | 3.4                  | 2.9                | 3.1              | 2.9                   | 3.1                  | 3.1  | 0.139   |         |

|                           |             |                    |                          |                  |                    |                  |                    |                    |             |         |
|---------------------------|-------------|--------------------|--------------------------|------------------|--------------------|------------------|--------------------|--------------------|-------------|---------|
| Sodium (mg)               | Ready meals | 875 <sup>a,b</sup> | 900 <sup>c,d,e,f,g</sup> | 830 <sup>c</sup> | 812 <sup>a,d</sup> | 833 <sup>e</sup> | 792 <sup>a,f</sup> | 784 <sup>b,g</sup> | 816         | < 0.001 |
|                           | Pizzas      | 476                | 506                      | 506              | 504                | 481              | 550                | 472                | 500         | 0.872   |
|                           | Salads      | 332                | 366                      | 358              | 338                | 375              | 359                | 387                | 362         | 0.782   |
| Fibre displayed<br>(n, %) | Ready meals | 52 (21.4)          | 102 (42.3)               | 243 (63.3)       | 251 (61.8)         | 235 (60.4)       | 270 (60.0)         | 314 (67.1)         | 1467 (56.8) |         |
|                           | Pizzas      | 8 (13.3)           | 12 (22.2)                | 25 (27.2)        | 31 (29.0)          | 23 (29.1)        | 25 (25.3)          | 28 (28.6)          | 152 (25.8)  |         |
|                           | Salads      | 21 (53.8)          | 34 (70.8)                | 76 (80.0)        | 67 (81.7)          | 92 (82.1)        | 97 (96.0)          | 116 (87.2)         | 503 (82.5)  |         |

Data for 2014 to 2019 from FoodTrack™ database; †ALDI products introduced in 2016 and IGA products introduced in 2017; ‡Data for 2020 from Woolworths, Coles and ALDI in Adelaide; §Kruskal-Wallis tests; Values for years within a row with like superscript letters significantly different using the Bonferroni post hoc test ( $p = 0.05$ );

\*Jonckheere Trend tests.

**Table S4:** Health Star Rating of ready meals, pizzas and salads displaying the rating from 2014 to 2020.

| Health Star Rating | Type of product | Year |       |      |      |       |      |       |      |      |      |      |      |       |      | Total |      |
|--------------------|-----------------|------|-------|------|------|-------|------|-------|------|------|------|------|------|-------|------|-------|------|
|                    |                 | 2014 |       | 2015 |      | 2016† |      | 2017† |      | 2018 |      | 2019 |      | 2020‡ |      |       |      |
|                    |                 | n    | %     | n    | %    | n     | %    | n     | %    | n    | %    | n    | %    | n     | %    | n     | %    |
| 2                  | Ready meals     | 0    | 0.0   | 1    | 1.7  | 0     | 0.0  | 0     | 0.0  | 1    | 0.4  | 3    | 1.1  | 3     | 1.0  | 8     | 0.6  |
|                    | Pizzas          | 0    | 0.0   | 1    | 25.0 | 4     | 18.2 | 7     | 17.9 | 8    | 15.1 | 8    | 12.9 | 8     | 11.6 | 36    | 14.5 |
|                    | Salads          | 0    | 0.0   | 0    | 0.0  | 0     | 0.0  | 0     | 0.0  | 0    | 0.0  | 0    | 0.0  | 0     | 0.0  | 0     | 0.0  |
| 2.5                | Ready meals     | 0    | 0.0   | 0    | 0.0  | 1     | 0.5  | 3     | 1.3  | 3    | 1.3  | 3    | 1.1  | 5     | 1.7  | 15    | 1.2  |
|                    | Pizzas          | 0    | 0.0   | 2    | 50.0 | 3     | 13.6 | 2     | 5.1  | 4    | 7.5  | 3    | 4.8  | 1     | 1.4  | 15    | 6.0  |
|                    | Salads          | 0    | 0.0   | 0    | 0.0  | 0     | 0.0  | 0     | 0.0  | 0    | 0.0  | 0    | 0.0  | 0     | 0.0  | 0     | 0.0  |
| 3                  | Ready meals     | 2    | 100.0 | 11   | 19.0 | 26    | 13.1 | 34    | 14.7 | 34   | 14.7 | 36   | 13.6 | 45    | 15.0 | 188   | 14.6 |
|                    | Pizzas          | 0    | 0.0   | 0    | 0.0  | 6     | 27.3 | 10    | 25.6 | 17   | 32.1 | 31   | 50.0 | 33    | 47.8 | 97    | 39.0 |
|                    | Salads          | 0    | 0.0   | 4    | 13.8 | 4     | 7.4  | 7     | 11.1 | 10   | 11.5 | 12   | 12.5 | 12    | 11.3 | 49    | 11.1 |
| 3.5                | Ready meals     | 0    | 0.0   | 33   | 56.9 | 115   | 57.8 | 132   | 56.9 | 143  | 61.6 | 152  | 57.4 | 172   | 57.3 | 747   | 58.0 |
|                    | Pizzas          | 0    | 0.0   | 1    | 25.0 | 9     | 40.9 | 20    | 51.3 | 24   | 45.3 | 19   | 30.6 | 26    | 37.7 | 99    | 39.8 |
|                    | Salads          | 3    | 42.9  | 13   | 44.8 | 28    | 51.9 | 33    | 52.4 | 42   | 48.3 | 42   | 43.8 | 33    | 31.1 | 194   | 43.9 |
| 4                  | Ready meals     | 0    | 0.0   | 12   | 20.7 | 52    | 26.1 | 61    | 26.3 | 48   | 20.7 | 67   | 25.3 | 68    | 22.7 | 308   | 23.9 |
|                    | Pizzas          | 0    | 0.0   | 0    | 0.0  | 0     | 0.0  | 0     | 0.0  | 0    | 0.0  | 1    | 1.6  | 1     | 1.4  | 2     | 0.8  |
|                    | Salads          | 3    | 42.9  | 11   | 37.9 | 17    | 31.5 | 18    | 28.6 | 26   | 29.9 | 38   | 39.6 | 53    | 50.0 | 166   | 37.6 |
| 4.5                | Ready meals     | 0    | 0.0   | 1    | 1.7  | 5     | 2.5  | 2     | 0.9  | 3    | 1.3  | 4    | 1.5  | 6     | 2.0  | 21    | 1.6  |
|                    | Pizzas          | 0    | 0.0   | 0    | 0.0  | 0     | 0.0  | 0     | 0.0  | 0    | 0.0  | 0    | 0.0  | 0     | 0.0  | 0     | 0.0  |
|                    | Salads          | 1    | 14.3  | 0    | 0.0  | 5     | 9.3  | 5     | 7.9  | 8    | 9.2  | 4    | 4.2  | 8     | 4.5  | 31    | 7.0  |
| 5                  | Ready meals     | 0    | 0.0   | 0    | 0.0  | 0     | 0.0  | 0     | 0.0  | 0    | 0.0  | 0    | 0.0  | 1     | 0.3  | 1     | 0.1  |
|                    | Pizzas          | 0    | 0.0   | 0    | 0.0  | 0     | 0.0  | 0     | 0.0  | 0    | 0.0  | 0    | 0.0  | 0     | 0.0  | 0     | 0.0  |
|                    | Salads          | 0    | 0.0   | 1    | 3.4  | 0     | 0.0  | 0     | 0.0  | 1    | 1.1  | 0    | 0.0  | 0     | 0.0  | 2     | 0.5  |

Data for 2014 to 2019 from FoodTrack™ database; No products displayed a Health Star Rating < 2; †ALDI products introduced in 2016 and IGA products introduced in 2017; ‡Data for 2020 from Woolworths, Coles and ALDI in Adelaide.
